# Supplementary material for: Column-based cortical depth analysis of the diffusion anisotropy and radiality in submillimeter whole-brain diffusion tensor imaging of the human cortical gray matter in vivo
Source: PubMed Central journal article supplement — Neuroimage. Author manuscript; Available in PMC 2023 Apr 15. (PMC10037338; doi:10.1016/j.neuroimage.2023.119993), 2023-03-01
Supplement: NIHMS1883365-supplement-1.pdf [file NIHMS1883365-supplement-1.pdf]

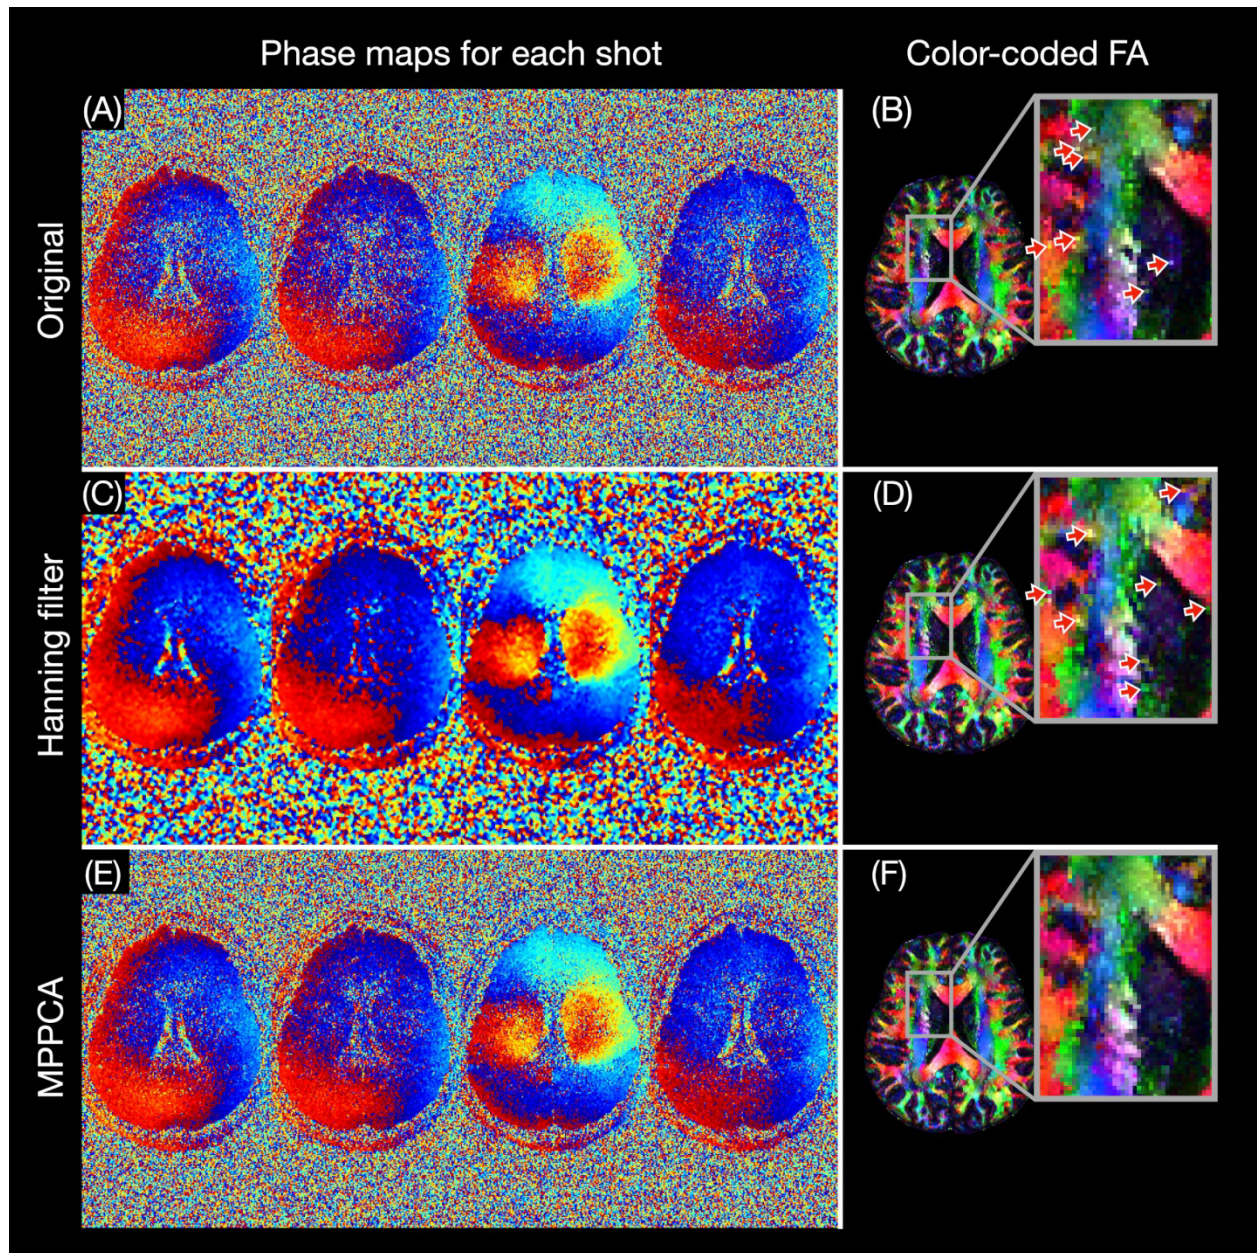

**Supplementary Figure S1:** Phase maps for each shot (A,C,E) and color-coded FA maps (B,D,F) from subject 3 with no smoothing or denoising of the phase maps (A,B), with a conventional smoothing of the phase maps using a Hanning filter (C,D), and with MPPCA denoising of the phase maps (E,F) in the MB-MUSE reconstruction. The arrows highlight areas with more noise in the FA maps.

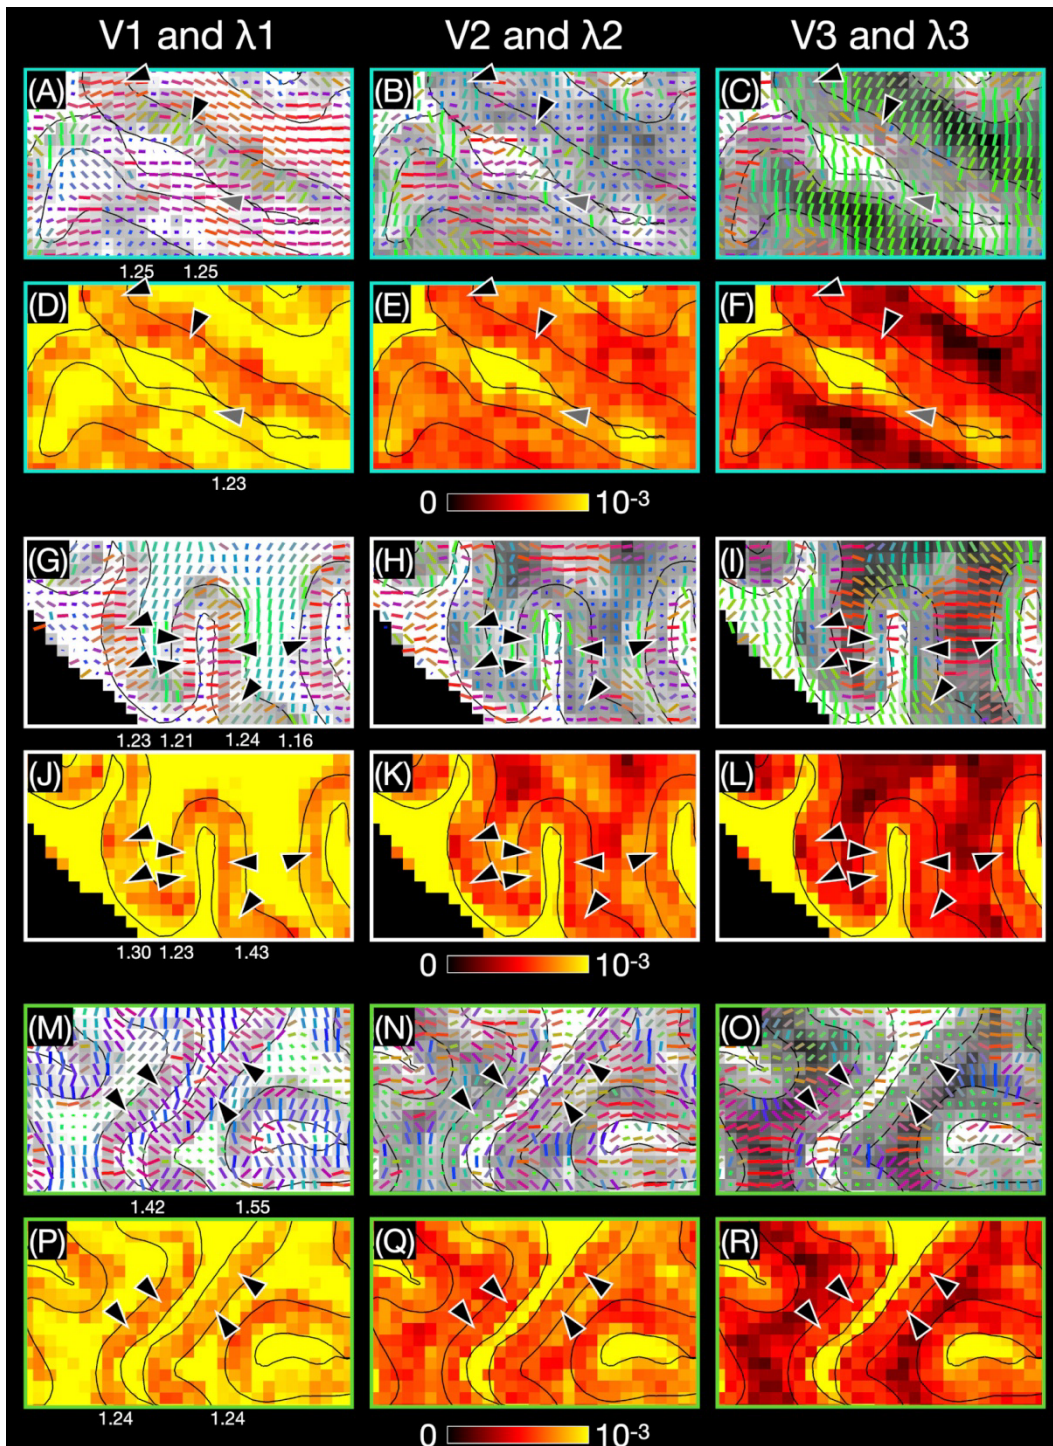

**Supplementary Figure S2:** Maps of the eigenvectors  $V_1$ ,  $V_2$ ,  $V_3$  (A–C, G–I, M–O) and eigenvalues  $\lambda_1$ ,  $\lambda_2$ ,  $\lambda_3$  (D–F, J–L, P–R) in the same regions as those shown in Fig. 3.

The black arrowheads point to cortical regions with a primarily radial diffusion orientation and the gray arrowhead points to the primary somatosensory cortex in the postcentral gyrus with a primarily tangential diffusion orientation. The black lines denote the pial surface and WM/GM interface derived from the registered T<sub>1</sub>-weighted anatomical images. The ratio between the first two eigenvalues  $\lambda_1/\lambda_2$  is shown above and below the  $\lambda_1$  maps for the representative voxels highlighted by arrowheads.

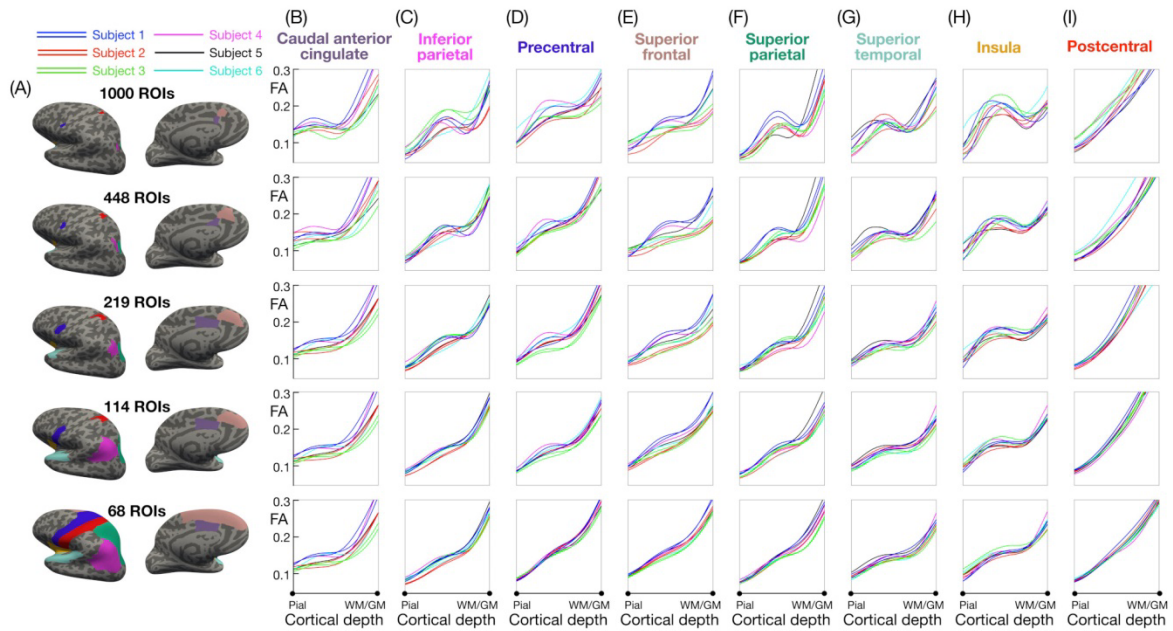

**Supplementary Figure S3: (A)** 8 representative ROIs from each of the 5 atlases. **(B-I)** FA vs. cortical depth profiles in each of these ROIs for both DTI scans from subjects 1-3 and the single DTI scan from subjects 4-6.

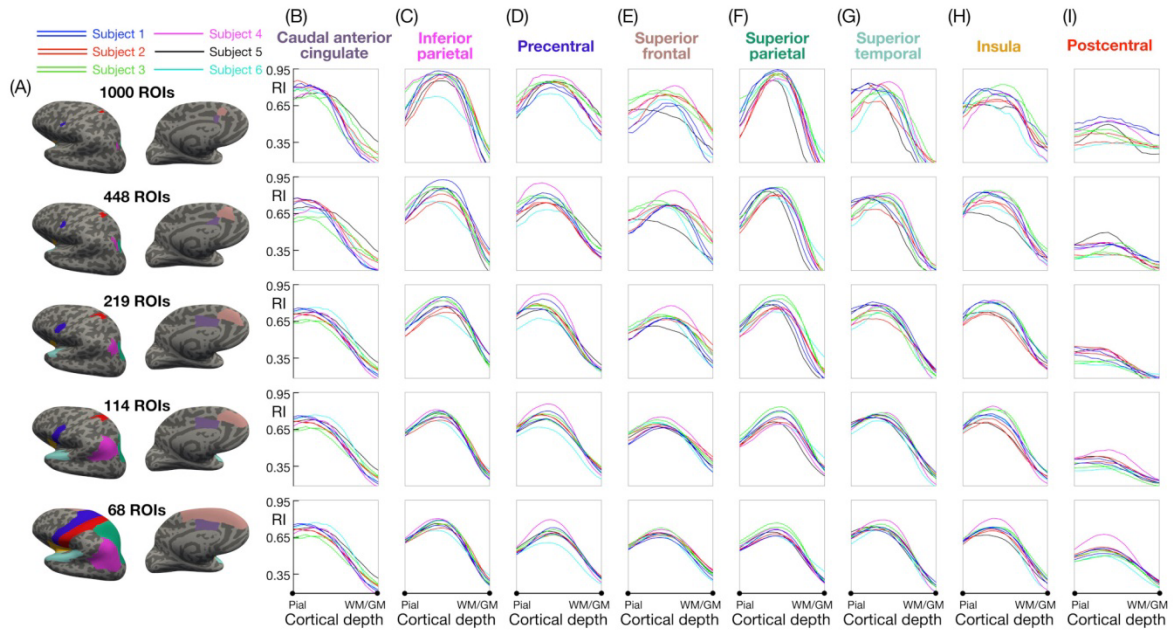

**Supplementary Figure S4: (A)** 8 representative ROIs from each of the 5 atlases. **(B-I)** RI vs. cortical depth profiles in each of these ROIs for both DTI scans from subjects 1-3 and the single DTI scan from subjects 4-6.

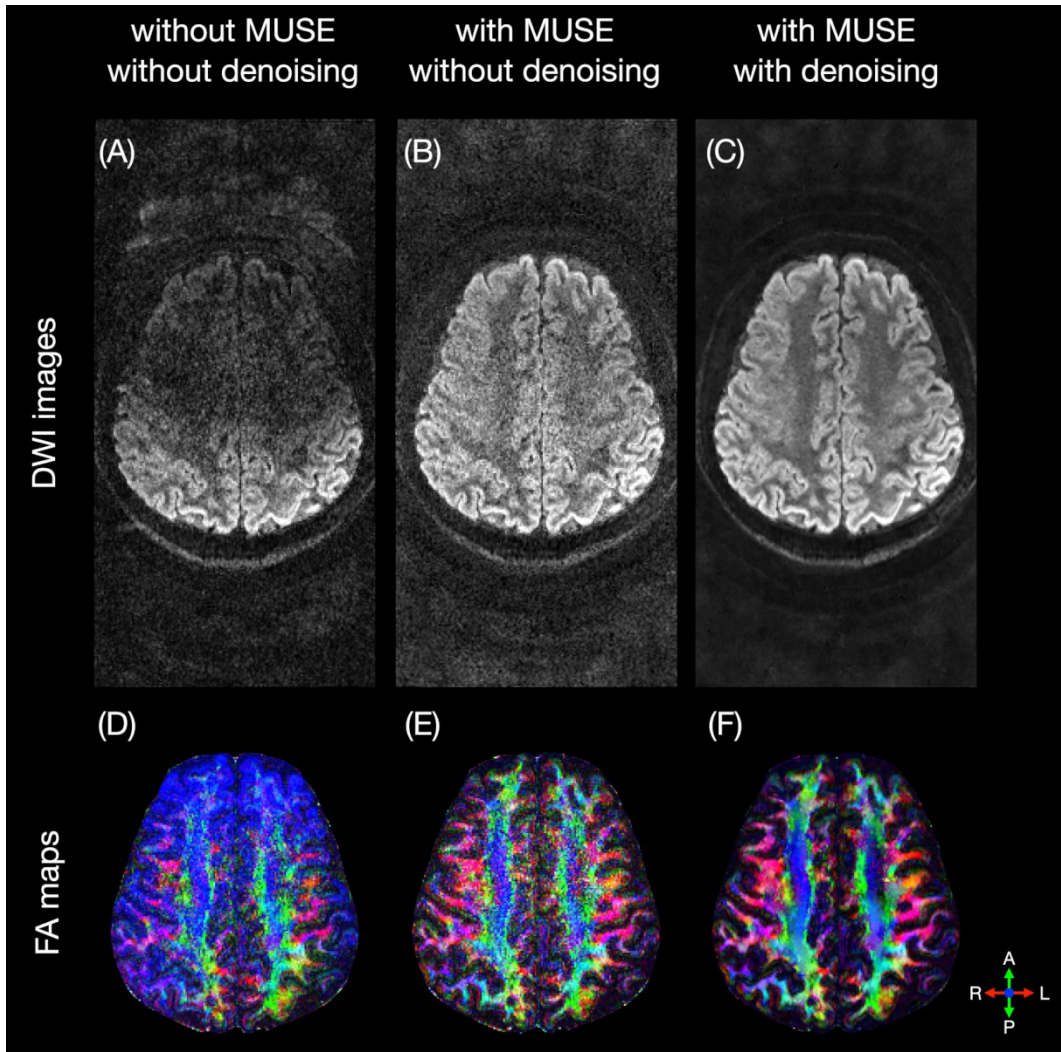

**Supplementary Figure S5:** DWI images (A–C) and color-coded FA maps (D–F) from subject 3 obtained without vs. with MUSE correction of motion-induced phase errors and without vs. with MPPCA denoising of the DWI images.

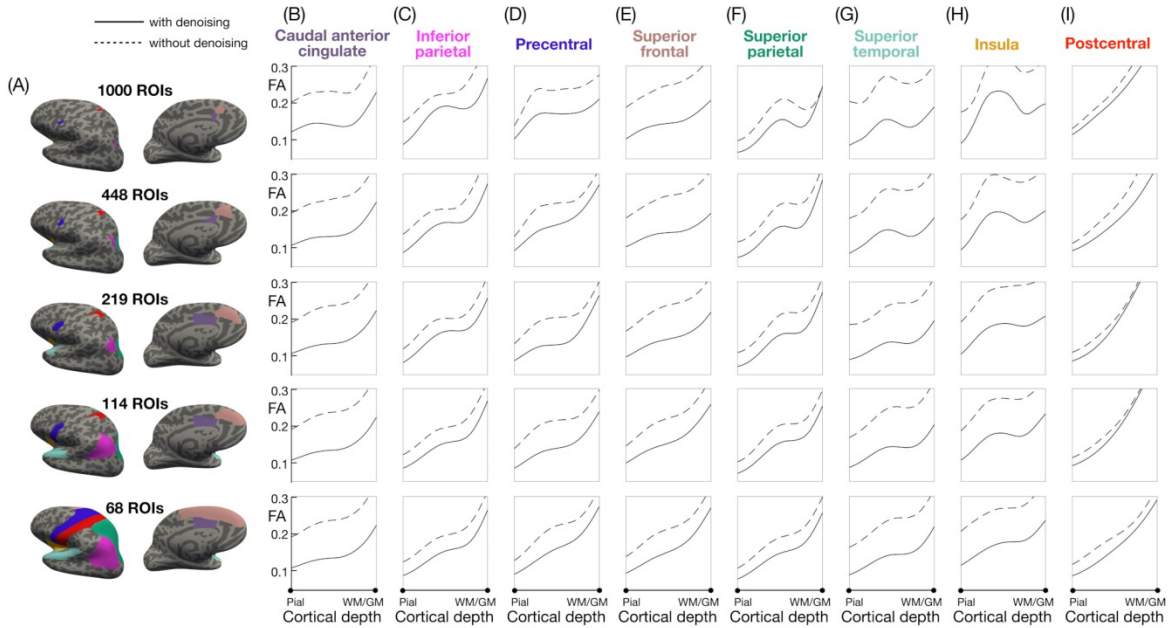

**Supplementary Figure S6: (A)** 8 representative ROIs from each of the 5 atlases. **(B-I)** FA vs. cortical depth profiles in each of these ROIs from subject 3 without (dashed lines) vs. with (solid lines) MPPCA denoising of the DWI images (and with all other parameters in the data analysis pipeline as used in Fig. 4).

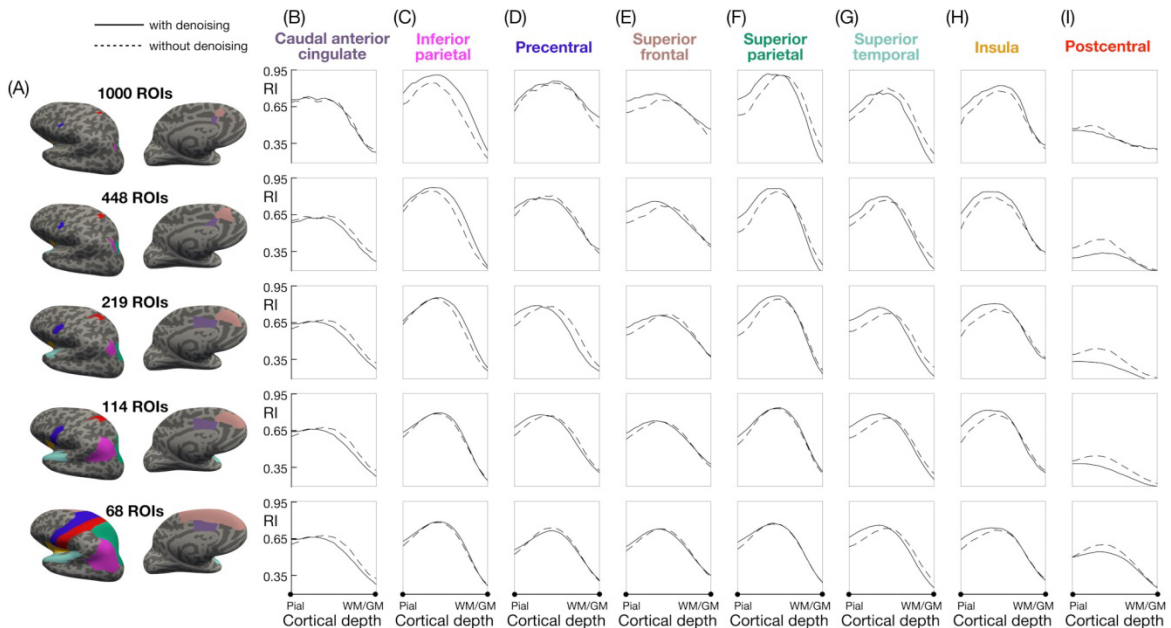

**Supplementary Figure S7:** (A) 8 representative ROIs from each of the 5 atlases. (B-I) RI vs. cortical depth profiles in each of these ROIs from subject 3 without (dashed lines) vs. with (solid lines) MPPCA denoising of the DWI images (and with all other parameters in the data analysis pipeline as used in Fig. 4).

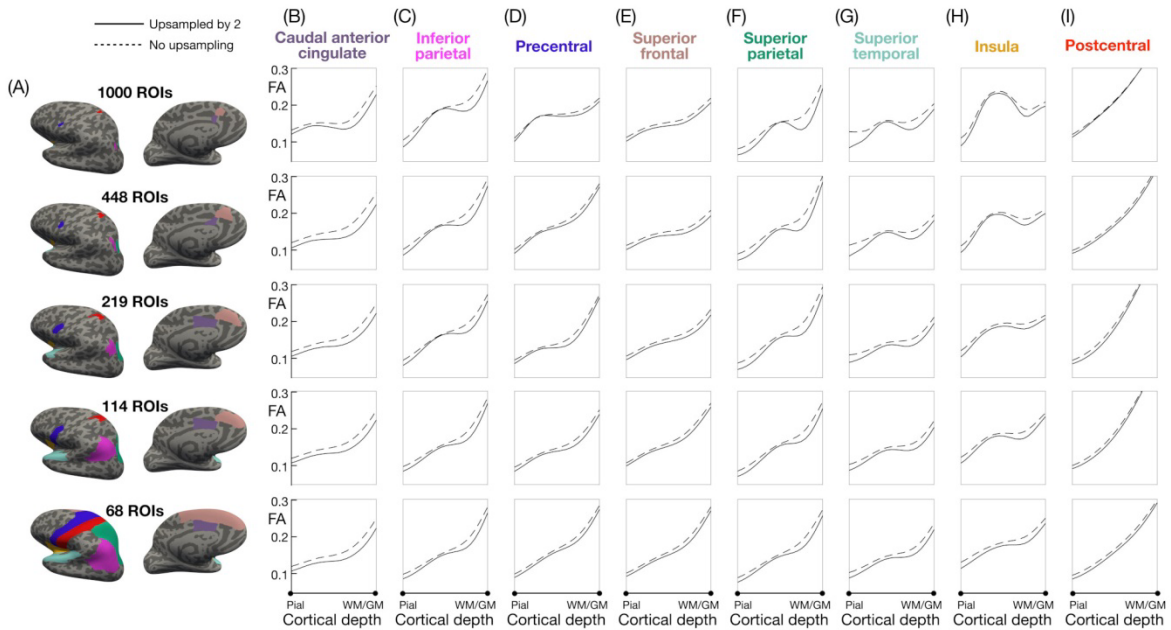

**Supplementary Figure S8:** (A) 8 representative ROIs from each of the 5 atlases. (B-I) FA vs. cortical depth profiles in each of these ROIs from subject 3 obtained without (dashed lines) vs. with (solid lines) upsampling the DWI images by a factor 2 before calculating the diffusion tensor (and with all other parameters in the data analysis pipeline as used in Fig. 4).

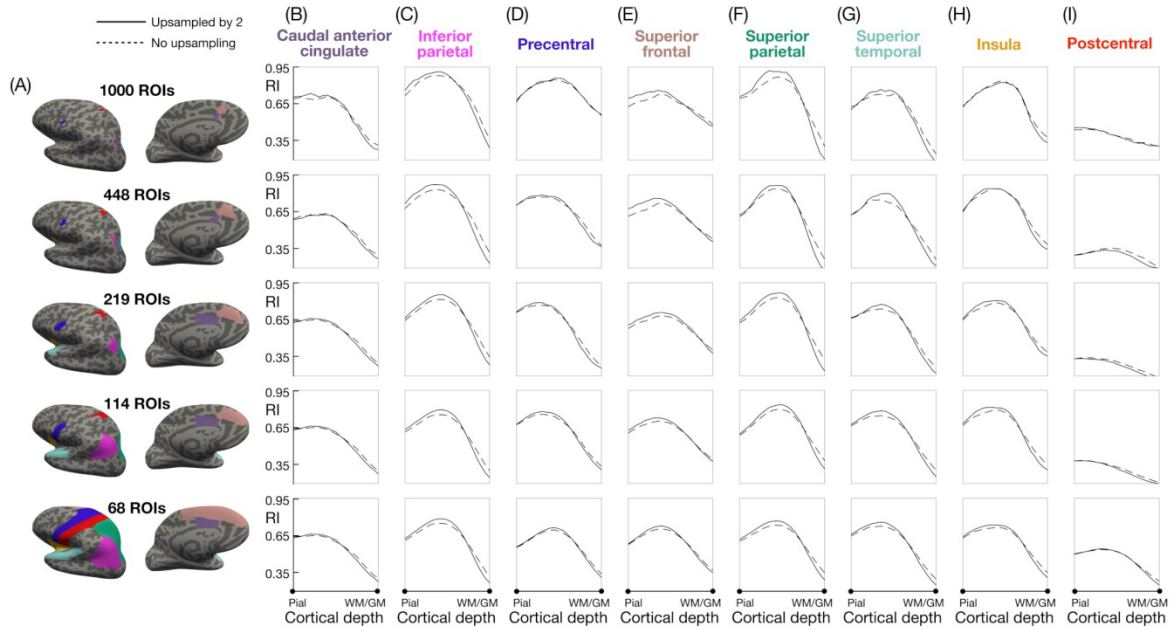

**Supplementary Figure S9: (A)** 8 representative ROIs from each of the 5 atlases. **(B-I)** RI vs. cortical depth profiles in each of these ROIs from subject 3 obtained without (dashed lines) vs. with (solid lines) upsampling the DWI images by a factor 2 before calculating the diffusion tensor (and with all other parameters in the data analysis pipeline as used in Fig. 4).



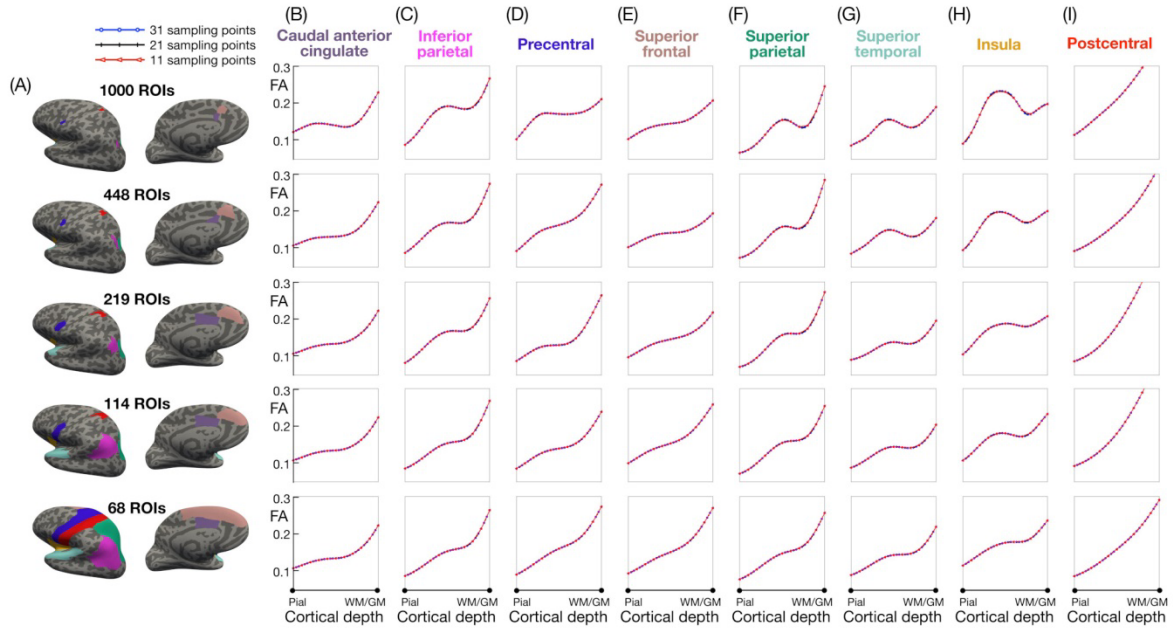

**Supplementary Figure S10: (A)** 8 representative ROIs from each of the 5 atlases. **(B-I)** FA vs. cortical depth profiles in each of these ROIs from subject 3 obtained with 11, 21, or 31 sampling points (i.e., with a step size of 10%, 5%, and 3.33% of the cortical thickness, respectively) (and with all other parameters in the data analysis pipeline as used in Fig. 4).

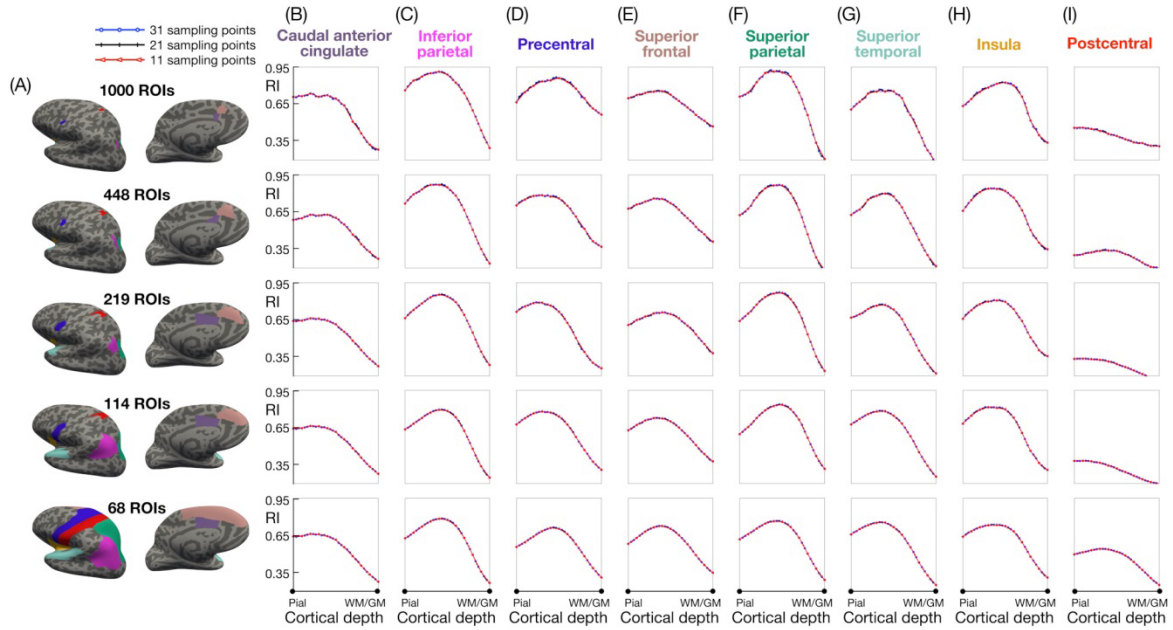

**Supplementary Figure S11: (A)** 8 representative ROIs from each of the 5 atlases. **(B-I)**

RI vs. cortical depth profiles in each of these ROIs from subject 3 obtained with 11, 21, or 31 sampling points (i.e., with a step size of 10%, 5%, and 3.33% of the cortical thickness, respectively) (and with all other parameters in the data analysis pipeline as used in Fig. 4).

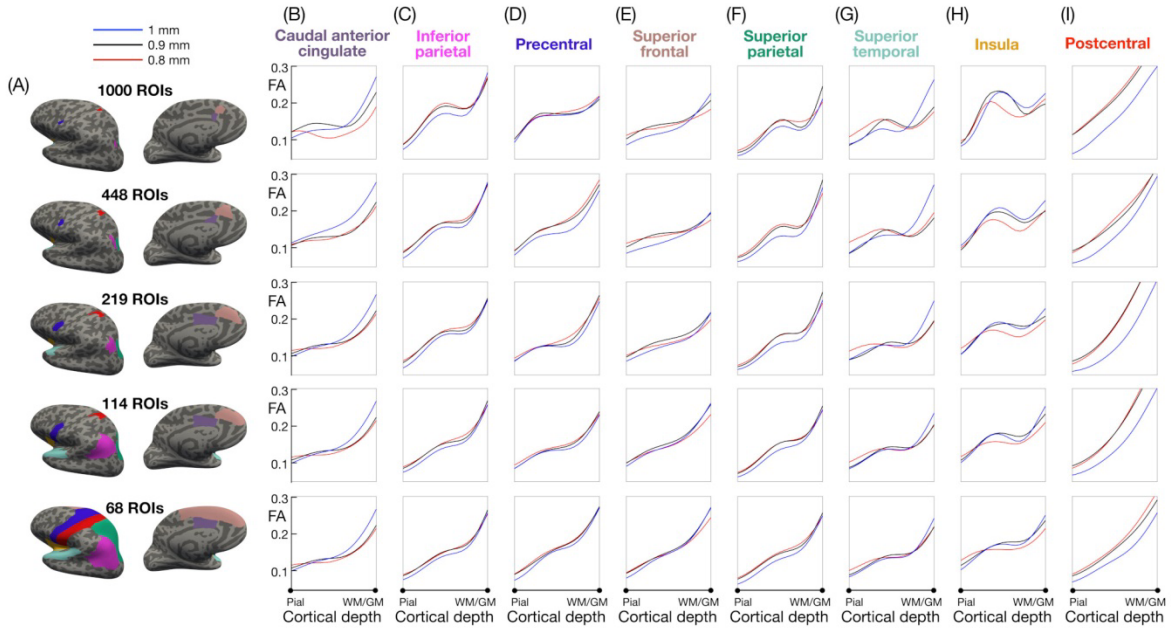

**Supplementary Figure S12: (A)** 8 representative ROIs from each of the 5 atlases. **(B-I)** FA vs. cortical depth profiles in each of these ROIs from subject 3 obtained with a spatial resolution of 0.8, 0.9, or 1.0 mm isotropic for both the DTI and anatomical scans (and with all parameters in the data analysis pipeline as used in Fig. 4).

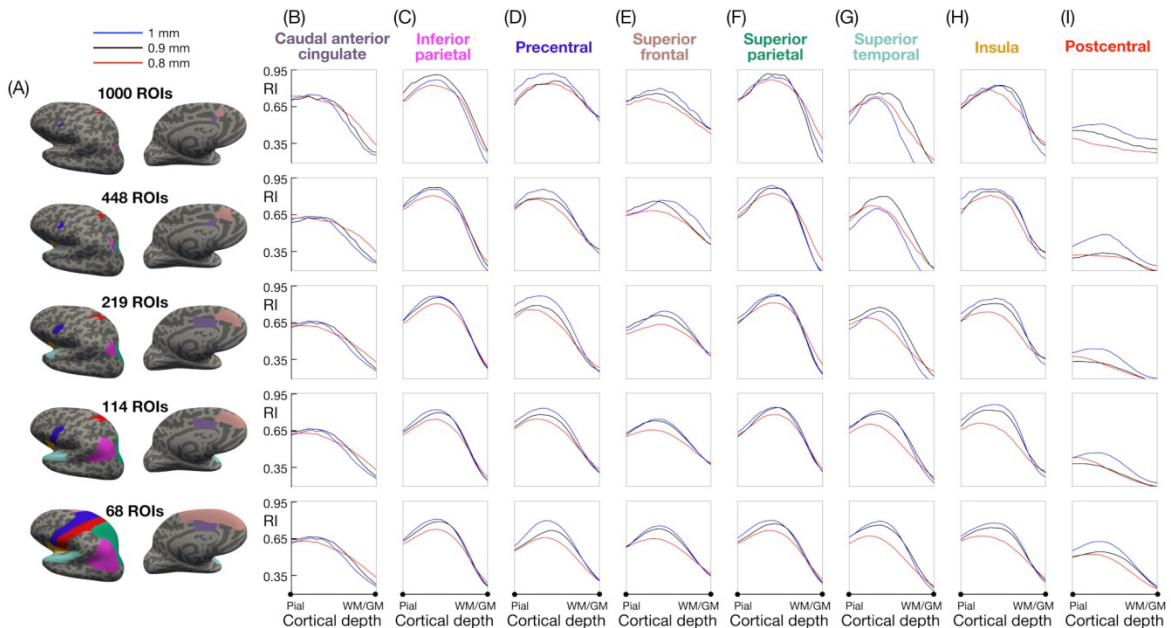

**Supplementary Figure S13:** (A) 8 representative ROIs from each of the 5 atlases. (B-I) RI vs. cortical depth profiles in each of these ROIs from subject 3 obtained with a spatial resolution of 0.8, 0.9, or 1.0 mm isotropic for both the DTI and anatomical scans (and with all parameters in the data analysis pipeline as used in Fig. 4).

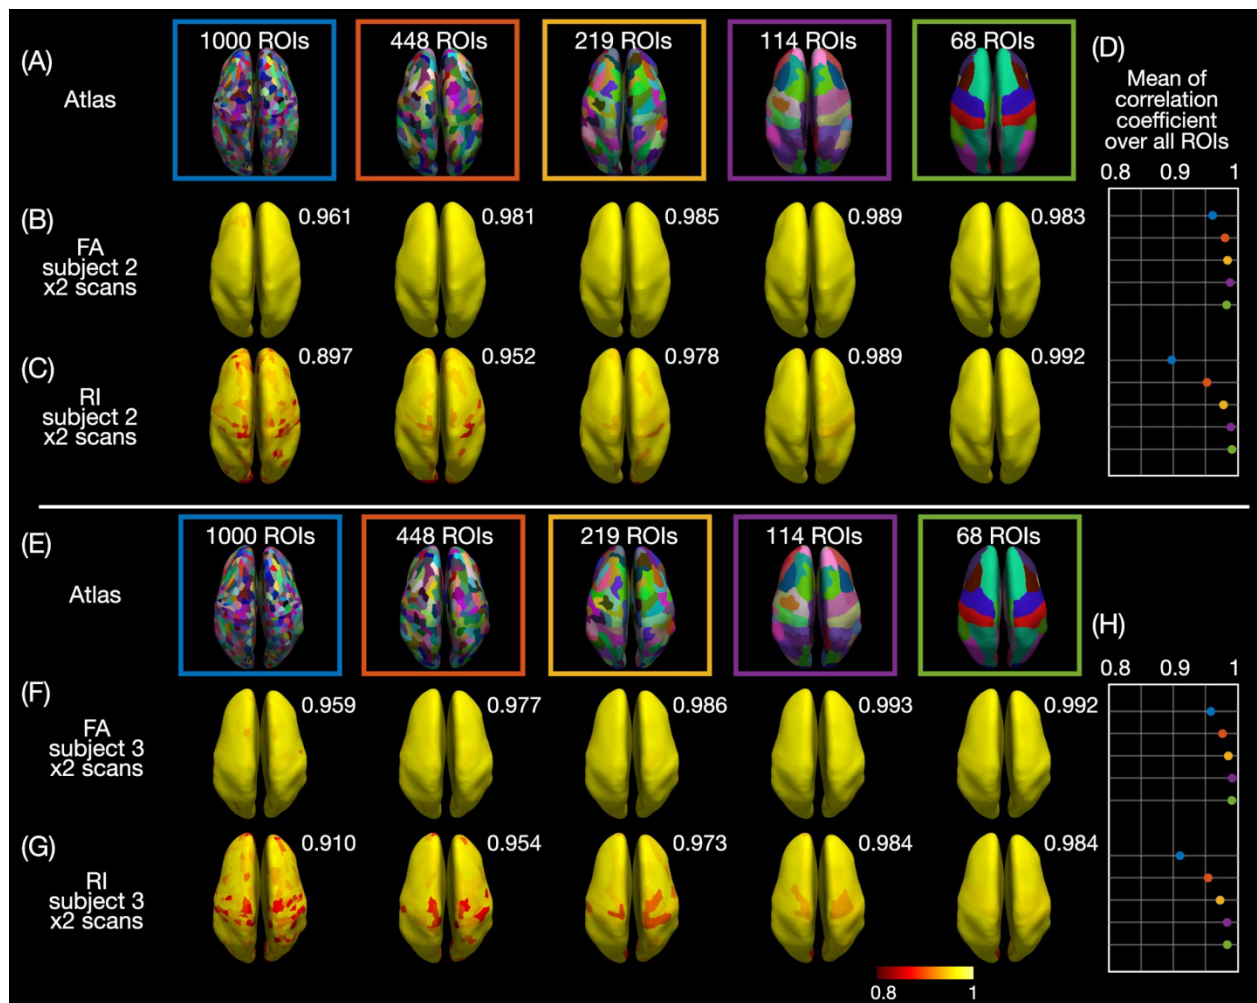

**Supplementary Figure S14:** (A,E) ROIs from the 5 atlases displayed on the inflated cortical surfaces of subjects 2 and 3. Correlation coefficient of the FA (B,F) or RI (C,G) vs. cortical depth profiles between both DTI scans of subjects 2 and 3 calculated in

each ROI and displayed on inflated cortical surfaces. **(D,H)** Plot of the mean correlation coefficients averaged over all ROIs (also shown at the top right corner of each brain).

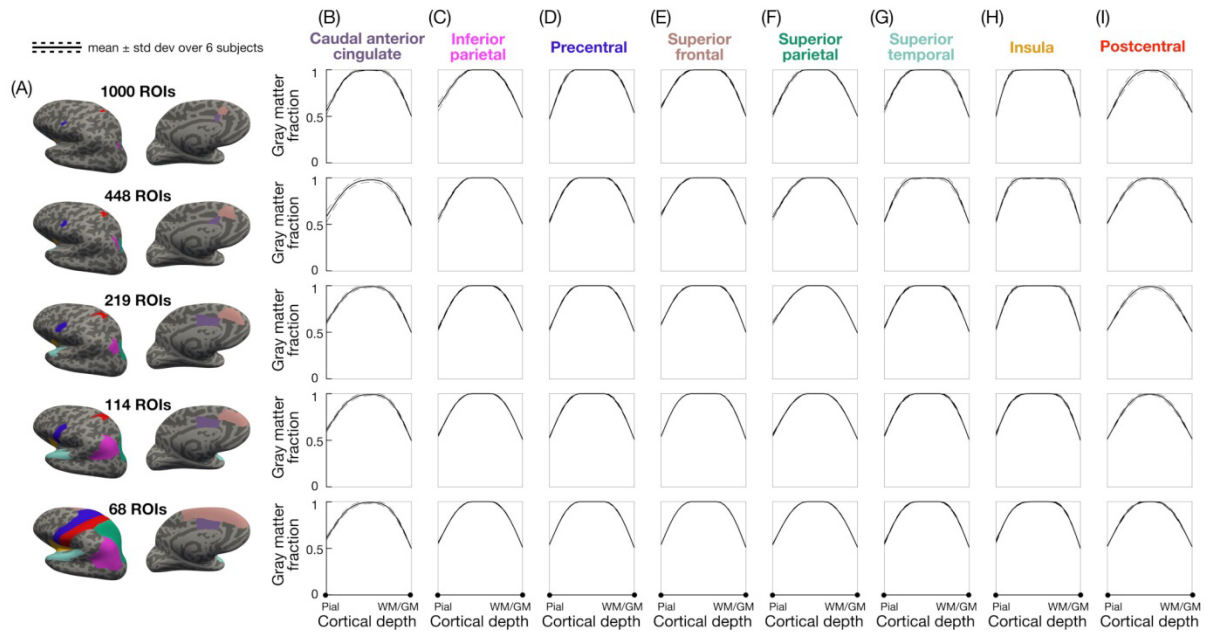

**Supplementary Figure S15: (A)** 8 representative ROIs from each of the 5 atlases. **(B-I)** Mean (solid lines)  $\pm$  standard deviation (dashed lines) across the 6 subjects of the GM fraction vs. cortical depth profiles in each of these ROIs.

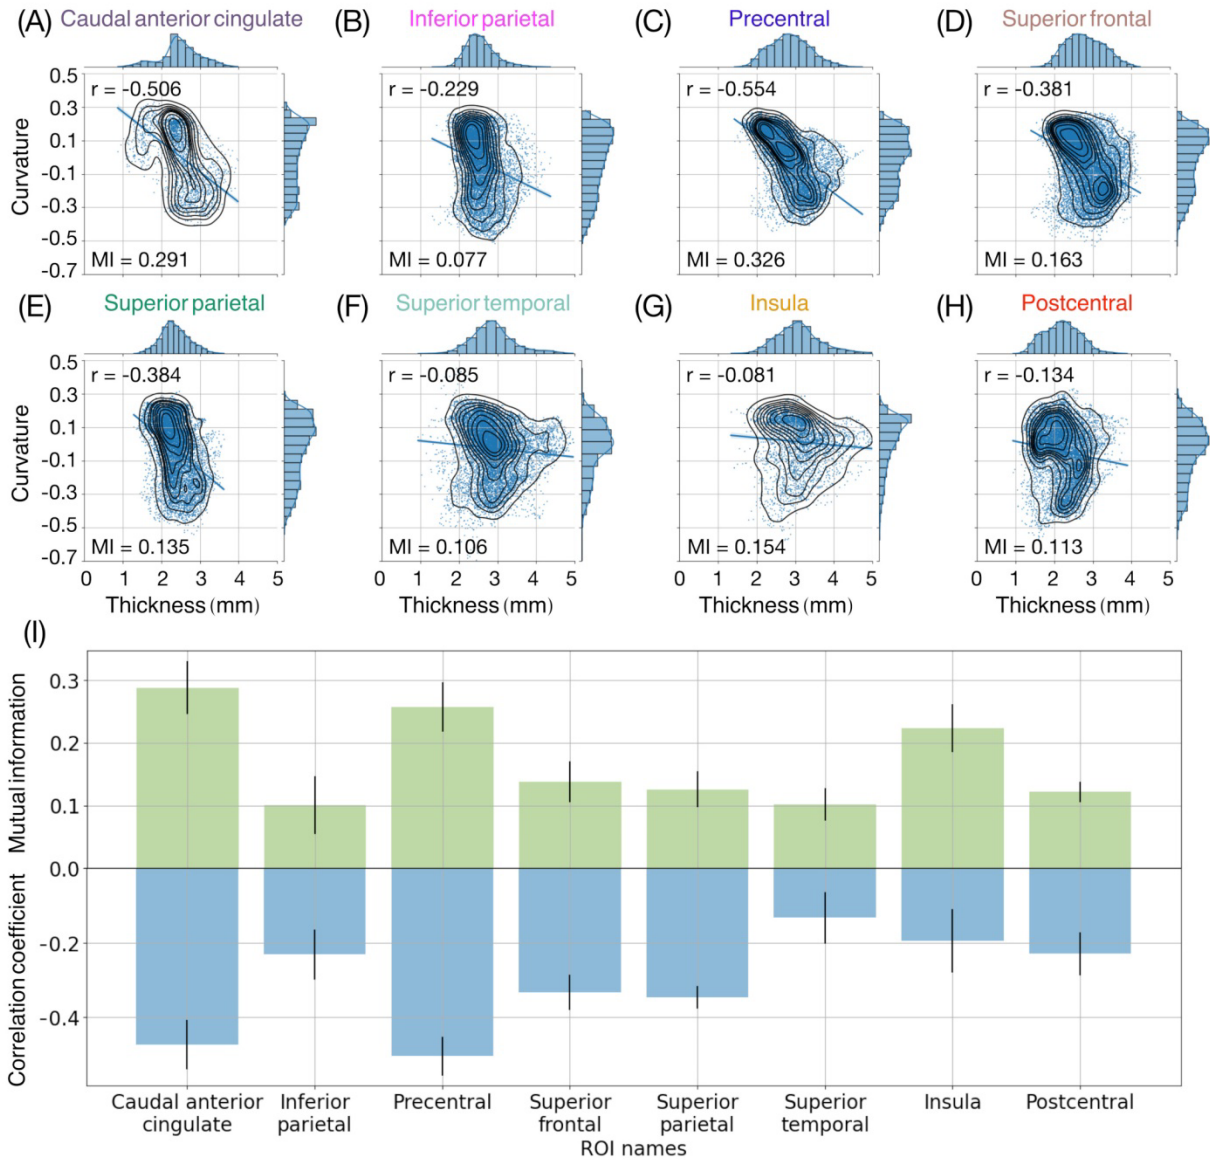

**Supplementary Figure S16:** (A–H) Scatter plots of the cortical curvature vs. cortical thickness in 8 representative ROIs from subject 3 (from the atlas with 68 ROIs), along with the corresponding linear regression (blue line), kernel density estimation (black lines), histograms, Pearson's correlation coefficient ( $r$ ), and mutual information (MI). (I) Mean  $\pm$  standard deviation across all subjects of the correlation coefficient and mutual information.
