# Supplementary material for: Column-based cortical depth analysis of the diffusion anisotropy and radiality in submillimeter whole-brain diffusion tensor imaging of the human cortical gray matter in vivo
Source: PubMed Central journal article supplement — Neuroimage. Author manuscript; Available in PMC 2023 Apr 15. (PMC10037338; doi:10.1016/j.neuroimage.2023.119993), 2023-03-01
Supplement: NIHMS1883365-supplement-2.pdf [file NIHMS1883365-supplement-2.pdf]

## Supplementary Material

Diffusion-weighting directions:

|           |           |           |
|-----------|-----------|-----------|
| 1.000000  | 0.000000  | 0.000000  |
| 0.694000  | 0.720000  | 0.000000  |
| -0.239000 | 0.549000  | 0.801000  |
| 0.877000  | -0.476000 | 0.068000  |
| -0.295000 | -0.541000 | 0.788000  |
| -0.559000 | -0.217000 | 0.800000  |
| 0.617000  | 0.336000  | 0.712000  |
| 0.053000  | 0.959000  | 0.277000  |
| 0.915000  | 0.256000  | 0.312000  |
| 0.004000  | -0.981000 | 0.195000  |
| -0.425000 | -0.797000 | -0.428000 |
| 0.364000  | -0.809000 | -0.462000 |
| -0.458000 | -0.803000 | 0.382000  |
| -0.667000 | 0.737000  | 0.108000  |
| -0.751000 | 0.016000  | -0.660000 |
| -0.364000 | -0.931000 | -0.014000 |
| 0.674000  | -0.549000 | -0.495000 |
| 0.499000  | -0.301000 | -0.812000 |
| -0.020000 | -0.777000 | -0.629000 |
| -0.727000 | 0.510000  | -0.460000 |
| 0.722000  | 0.571000  | 0.390000  |
| -0.499000 | 0.324000  | -0.804000 |
| 0.924000  | -0.171000 | 0.343000  |
| 0.301000  | 0.548000  | 0.780000  |
| -0.096000 | 0.194000  | -0.976000 |
| 0.461000  | -0.846000 | 0.270000  |
| 0.763000  | -0.098000 | -0.638000 |
| 0.019000  | 0.276000  | 0.961000  |
| 0.055000  | 0.835000  | -0.548000 |
| 0.904000  | 0.418000  | -0.096000 |
| -0.092000 | 0.551000  | -0.830000 |
| -0.268000 | -0.004000 | 0.963000  |
| -0.389000 | -0.059000 | -0.919000 |
| -0.674000 | -0.525000 | 0.520000  |
| -0.891000 | -0.187000 | 0.414000  |
| -0.918000 | 0.276000  | 0.286000  |
| 0.379000  | -0.693000 | 0.613000  |
| -0.307000 | 0.948000  | 0.087000  |
